# Supplementary material
Source: PubMed Central journal article supplement (PMC4754551)
Supplement: mt2015191x1.pdf [file mt2015191x1.pdf]

**a**

## 5L7 Heavy chain variable region - overlapping peptides

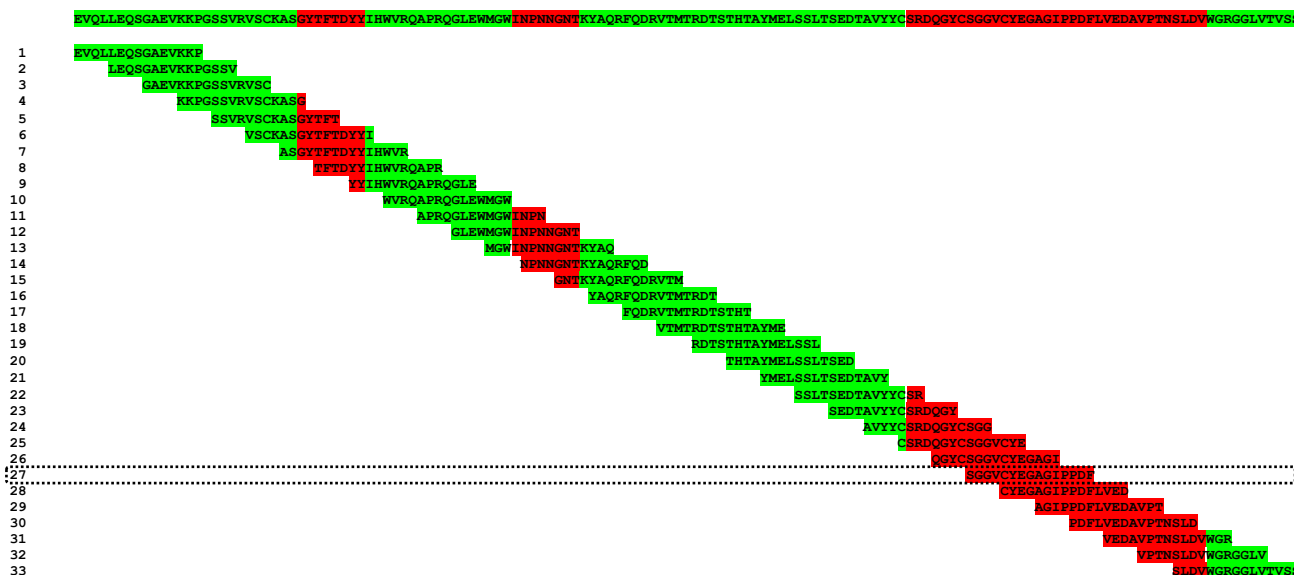

## 5L7 Light chain variable region - overlapping peptides

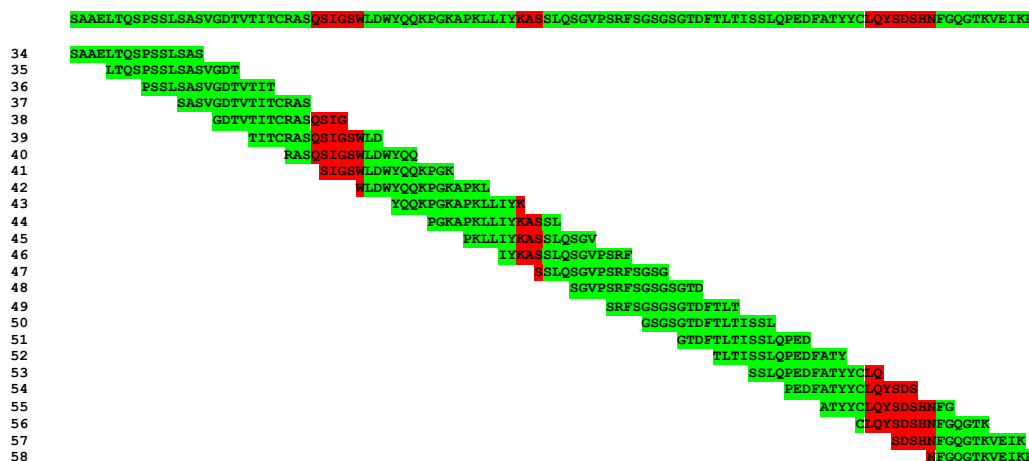

**b**

## Comparison of full length CDR-H3 peptides and peptides 27

|                                                                                                   |                  |
|---------------------------------------------------------------------------------------------------|------------------|
| <u>S</u> RD <u>Q</u> GYCS <u>G</u> GV <u>C</u> Y <u>E</u> GAGIPDFL <u>V</u> EDAVPT <u>I</u> NSLDV | 5L7 full_CDR-H3  |
| <u>A</u> RD <u>L</u> GYCS <u>D</u> GV <u>C</u> Y <u>D</u> GAGIPDFI <u>G</u> IPAV <u>P</u> MNSLDV  | 4L6 full_CDR-H3  |
| <u>S</u> <u>G</u> GV <u>C</u> Y <u>E</u> GAGIPDF                                                  | 5L7 pep27_CDR-H3 |
| <u>S</u> <u>D</u> GV <u>C</u> Y <u>D</u> GAGIPDF                                                  | 4L6 pep27_CDR-H3 |

**Figure S1. Amino acid sequences of the overlapping peptides used in the Pepscans. (a)** Oligopeptides spanning both the heavy chain variable region (upper part) and the light chain variable region (lower part) of 5L7 IgG1. Corresponding residues to the CDRs are indicated in red. Peptide 27 is boxed for clarity. Peptides were 15-mer in length and overlapped by 11. **(b)** Alignment of full-length CDR-H3 peptides and corresponding peptides 27 for both 5L7 IgG1 and 4L6 IgG1. Amino acid differences are underlined and colored in blue.
